# Supplementary material for: Children’s Narratives of Family Life in Ghana: A Cultural Lens via Story Stems
Source: Springer Nature journal article supplement (doi:10.1007/s10826-020-01839-6), 2020-10-12
Supplement: MOESM1 [file 18475620]

**Supplementary Material**

**Story stem set-up and sample MCAST story stem script modified for the Ghanaian context:**

**Materials:** Doll’s house and minimal furniture, doll figures (selection of child and adult dolls offered to the child from which to select the ‘child-doll’ and the ‘caregiver-doll’), camcorder.

**Introducing the task**: "We are going to make some stories today. First, I'm going to tell you the start of a story with ‘[child’s name]-doll’ (hold selected doll up) and ‘(mamma/other caregiver]-doll’ (hold selected doll up) in it. Then when we get into the story, I will pass the dolls to you and you will continue the story and show and tell me what happens next.

**Story stems:** Breakfast (practice stem), bad dream, hurt knee, pain in the stomach, shopping.

**Example story stem**: **Shopping**

Set up: The dolls’ house is taken away and furniture from the house is used to create a schematic market

with stalls spread across streets.

Basic script: “Today, [Child]-doll and Mamma-doll are going to the market. So, they’re walking down to look at what’s at the market stalls and it’s a busy market day. There’s lots of people everywhere so they have to hold on tight to each other’s hand [demonstrate avoiding bumping into people]. So, they look at this stall here and then this stall here. Then [child]-doll looks at this stall here (move Mamma doll away to another stall further away out of sight of the [child]-doll). Then [child]-doll turns around and s/he can see lots of people around but she can’t see her Mamma. She looks around but can’t see her anywhere. ‘Mamma’, s/he shouts, “Mamma!” Then s/he feels very scared and she cries ‘Where’s my Mamma? Where’s my Mamma?... What happens next?

Example prompts: ‘And then what happens after that?’ ‘If something more happened, what would it be?’

Probes: ‘What is [Child]-doll thinking now?’ ‘What is [Child]-doll feeling now?’ ‘What is Mamma-doll thinking?’ ‘What is Mamma-doll feeling?’
